# Supplementary material
Source: PubMed Central journal article supplement (PMC7539215)
Supplement: EMMM-12-e13038-s001.pdf [file EMMM-12-e13038-s001.pdf]

**“Monocytopenia, monocyte morphological anomalies and hyperinflammation characterise severe COVID-19 in type 2 diabetes”**

**Contents:**

| <b>Page</b> | <b>Item</b>                                                                                                                                                                         |
|-------------|-------------------------------------------------------------------------------------------------------------------------------------------------------------------------------------|
| <b>2</b>    | <b>Appendix Table S1. Full blood count of COVID-19 patients in the non-diabetic (ND) and type-2 diabetic (T2D) groups at admission to hospital</b>                                  |
| <b>3</b>    | <b>Appendix Table S2. Flow cytometry-based counts of PBMCs, monocytes and monocyte subpopulations in non-diabetic (ND) and type-2 diabetic (T2D) patients with COVID-19</b>         |
| <b>4</b>    | <b>Appendix Table S3. Flow cytometry-based frequency of immune populations and subpopulations in non-diabetic (ND) and type-2 diabetic (T2D) patients with and without COVID-19</b> |
| <b>5</b>    | <b>Appendix Table S4. Multivariate ANOVA (MANOVA) and univariate ANOVA F-values to test differences among cell-type percent according clinical characteristics</b>                  |
| <b>6</b>    | <b>Appendix Table S5. Sample size and statistics table</b>                                                                                                                          |
| <b>7</b>    | <b>Appendix Figure S1. Immunophenotyping approach and subpopulations quantified in peripheral venous blood.</b>                                                                     |
| <b>9</b>    | <b>Appendix Figure S2. Characterisation of monocyte morphology and inflammatory cells from peripheral circulation ND and T2D COVID-19 patients.</b>                                 |
| <b>11</b>   | <b>Appendix Figure S3. Characterisation of monocyte morphology and inflammatory cells from peripheral circulation ND and T2D COVID-19 patients.</b>                                 |
| <b>13</b>   | <b>Appendix Figure S4. Immunophenotypic analyses of T2D patients with COVID-19 treated in general wards or in ICU</b>                                                               |

**Appendix Table S1. Full blood count of COVID-19 patients in the non-diabetic (ND) and type-2 diabetic (T2D) groups at admission to hospital**

| Cell counted<br>( $10^9/L$ or $10^6/mL$ ) | ND<br>(n=15)     | T2D<br>(n=30)    | <i>p</i> -value | <i>Reference ranges</i><br>( $10^9/L$ or $10^6/mL$ ) |
|-------------------------------------------|------------------|------------------|-----------------|------------------------------------------------------|
| Leukocytes                                | 6.3 (5.5-7.8)    | 6 (4.8-7.45)     | 0.255           | 4.0 – 11.0                                           |
| Neutrophils                               | 3.93 (3.23-5.27) | 3.81 (2.92-5.08) | 0.497           | 2.0 - 7.5                                            |
| Lymphocytes                               | 1.18 (1.07-1.75) | 1.3 (0.91-1.65)  | 0.860           | 1.5 - 4.5                                            |
| Monocytes                                 | 0.63 (0.48-0.76) | 0.44 (0.33-0.62) | 0.028           | 0.2 - 0.8                                            |

**Appendix Table S2. Flow cytometry-based counts of PBMCs, monocytes and monocyte subpopulations in non-diabetic (ND) and type-2 diabetic (T2D) patients with COVID-19**

| Leukocyte populations<br>(10 <sup>9</sup> /L or 10 <sup>6</sup> /mL) | ND<br>(n=15)      | T2D<br>(n=30)     | <i>p-value</i> |
|----------------------------------------------------------------------|-------------------|-------------------|----------------|
| CD45 <sup>+</sup> PBMCs                                              | 6.83 (3.71-13.44) | 6.06 (2.35-15.49) | 0,444          |
| CD14 <sup>+</sup> Monocytes                                          | 0.75 (0.24-1.71)  | 0.49 (0.13-1.26)  | 0,032          |
| CD14 <sup>Hi</sup> CD16 <sup>-</sup> Classical                       | 0.55 (0.33-1.01)  | 0.35 (0.08-1.11)  | 0,005          |
| CD14 <sup>Hi</sup> CD16 <sup>+</sup> Intermediate                    | 0.08 (0.01-0.32)  | 0.07 (0.002-0.25) | 0,660          |
| CD14 <sup>Lo</sup> CD16 <sup>-</sup> Non-classical                   | 0.02 (0.00-0.07)  | 0.01 (0.00-0.06)  | 0,054          |

**Appendix Table S3. Flow cytometry-based frequency of immune populations and subpopulations in non-diabetic (ND) and type-2 diabetic (T2D) patients with and without COVID-19**

| Immune population<br>(mean freq +/- SD) | COVID-19     |               | Uninfected    |               |
|-----------------------------------------|--------------|---------------|---------------|---------------|
|                                         | ND<br>(n=15) | T2D<br>(n=30) | ND<br>(n=36)  | T2D<br>(n=22) |
| Lymphocytes                             | 10.8 +/- 6.1 | 12.2 +/- 10.1 | 22.2 +/- 9.5  | 31.1 +/- 18.4 |
| CD8+                                    | 3.7 +/- 2.4  | 5.0 +/- 5.0   | 6.4 +/- 4.5   | 8.8 +/- 7.3   |
| CD4+                                    | 6.8 +/- 5.1  | 6.1 +/- 4.4   | 10.4 +/- 5.0  | 13.5 +/- 15.0 |
| DN                                      | 0.9 +/- 0.7  | 0.8 +/- 0.7   | 2.3 +/- 2.3   | 1.5 +/- 2.1   |
| DP                                      | 0.1 +/- 0.1  | 0.07 +/- 0.07 | 0.2 +/- 0.1   | 7.3 +/- 10.1  |
| Monocytes                               | 9.9 +/- 2.0  | 7.6 +/- 3.6   | 9.0 +/- 2.2   | 9.9 +/- 4.9   |
| Classical                               | 7.9 +/- 3.6  | 5.7 +/- 2.5   | 7.4 +/- 2.7   | 8.3 +/- 6.7   |
| intermediate                            | 1.0 +/- 1.3  | 1.2 +/- 1.5   | 1.5 +/- 0.9   | 1.9 +/- 1.7   |
| non-classical                           | 0.3 +/- 0.3  | 0.2 +/- 0.2   | 0.4 +/- 0.3   | 0.2 +/- 0.4   |
| DCs                                     | 1.5 +/- 0.9  | 1.7 +/- 0.9   | 0.9 +/- 0.4   | 1.9 +/- 2.1   |
| mDCs                                    | 0.2 +/- 0.2  | 0.4 +/- 0.3   | 0.3 +/- 0.3   | 0.2 +/- 0.3   |
| pDCs                                    | 0.3 +/- 0.5  | 0.2 +/- 0.3   | 0.3 +/- 0.2   | 0.3 +/- 0.5   |
| B-cells                                 | 2.5 +/- 2.8  | 2.4 +/- 2.0   | 5.2 +/- 9.1   | 5.8 +/- 5.1   |
| NK-cells                                | 4.9 +/- 2.5  | 2.4 +/- 2.0   | 5.2 +/- 9.1   | 5.8 +/- 5.1   |
| iNK cells                               | 3.7 +/- 2.3  | 4.4 +/- 2.7   | 3.8 +/- 5.3   | 2.8 +/- 3.0   |
| NKT- cells                              | 1.1 +/- 1.3  | 1.7 +/- 1.7   | 0.9 +/- 0.9   | 1.4 +/- 1.5   |
| Granulocytes                            | 62 +/- 12.7  | 59.2 +/- 14.8 | 37.9 +/- 16.4 | 43.9 +/- 17.7 |

**Appendix Table S4. Multivariate ANOVA (MANOVA) and univariate ANOVA F-values to test differences among cell-type percent according clinical characteristics**

|              | MANOVA |              |        |        | ANOVA F-values |               |                    |          |
|--------------|--------|--------------|--------|--------|----------------|---------------|--------------------|----------|
|              | DF     | Pillai trace | Num DF | F      | Classical      | Non-Classical | Intermediate cytes | Lympho-  |
| Diabetes     | 1      | 0,37         | 4,00   | 4.95** | 6.43*          | 0,76          | 1,82               | 0,01     |
| COVID-19     | 1      | 0,39         | 4,00   | 5.52** | 9.65**         | 5.57*         | 0,12               | 4.21*    |
| Sex          | 1      | 0,32         | 4,00   | 4.04** | 0,30           | 0,82          | 1,05               | 13.03*** |
| BMI          | 1      | 0,01         | 4,00   | 0,08   | 0,15           | 0,00          | 0,00               | 0,00     |
| Hypertension | 1      | 0,05         | 4,00   | 0,49   | 0,91           | 0,00          | 0,00               | 0,00     |

p-value \* <0.05 \*\* <0.01 \*\*\* <0.001

**Appendix Table S5. Sample size and statistical table**

| <b>Figure</b> | <b>Panel</b> | <b>n</b>                                         | <b>p-value</b>                                                                                              |
|---------------|--------------|--------------------------------------------------|-------------------------------------------------------------------------------------------------------------|
| <b>1</b>      | A            | 15 (ND) 30 (T2D)                                 | *=0.0496                                                                                                    |
|               | B            | 15 (ND) 30 (T2D)                                 | *=0,0170                                                                                                    |
|               | C            | 15 (ND) 30 (T2D) 30 (T2D non-COVID)              | See appendix tables 1-3                                                                                     |
| <b>2</b>      | A            | 15 (ND) 30 (T2D)                                 | *= 0,0384; **=0,0082                                                                                        |
|               | B            | 15 (ND) 30 (T2D)                                 | p=0.0541; *=0,0478                                                                                          |
|               | C            | 45 (15 ND + 30 T2D)                              | *=0,0482                                                                                                    |
|               | D            | 45 (15 ND + 30 T2D)                              | *=0.0317                                                                                                    |
|               | E            | 45 (15 ND + 30 T2D)                              | R=0.016 p= 0.01                                                                                             |
|               | F            | 14 (ND) 28 (T2D)                                 | **=0.0081; ***<0.0001                                                                                       |
|               | G            | 11 (ND-Gen) 4 (ND-ICU) 19 (T2D-Gen) 11 (T2D-ICU) | *= 0,0186                                                                                                   |
| <b>3</b>      | A            | 14 (ND) 28 (T2D)                                 | **=0,0081; *=0.0172; R2=0.11 p=0.03                                                                         |
|               | B            | 45 (15 ND + 30 T2D)                              | NA                                                                                                          |
|               | C            | 15 (ND) 30 (T2D)                                 | NA                                                                                                          |
|               | D            | 45 (15 ND + 30 T2D)                              | NA                                                                                                          |
|               | E            | 15 (ND) 30 (T2D)                                 | *=0.0329                                                                                                    |
|               | F            | 45 (15 ND + 30 T2D)                              | R2=0.07 p=0.04                                                                                              |
|               | G            | 11 (ND-Gen) 4 (ND-ICU) 19 (T2D-Gen) 11 (T2D-ICU) | p=0.0154                                                                                                    |
|               | H            | 11 (ND-Gen) 4 (ND-ICU) 19 (T2D-Gen) 11 (T2D-ICU) | Classical [*=0.0154 amongst ND and 0.0267 amongst T2D]<br>Intermediate [*0.0236 between ND-Gen and T2D-ICU] |
| <b>4</b>      | A            | 45 (15 ND + 30 T2D)                              | NA                                                                                                          |
|               | B            | 30 (19 Gen + 11 ICU)                             | *=0.037                                                                                                     |
|               | C            | 30 (19 Gen + 11 ICU)                             | Lymphocyte subpopulations *=0,039727<br>Monocyte subpopulations *=0,01147                                   |
|               | D            | 45 (15 ND + 30 T2D)                              | NA                                                                                                          |

NA=not applicable

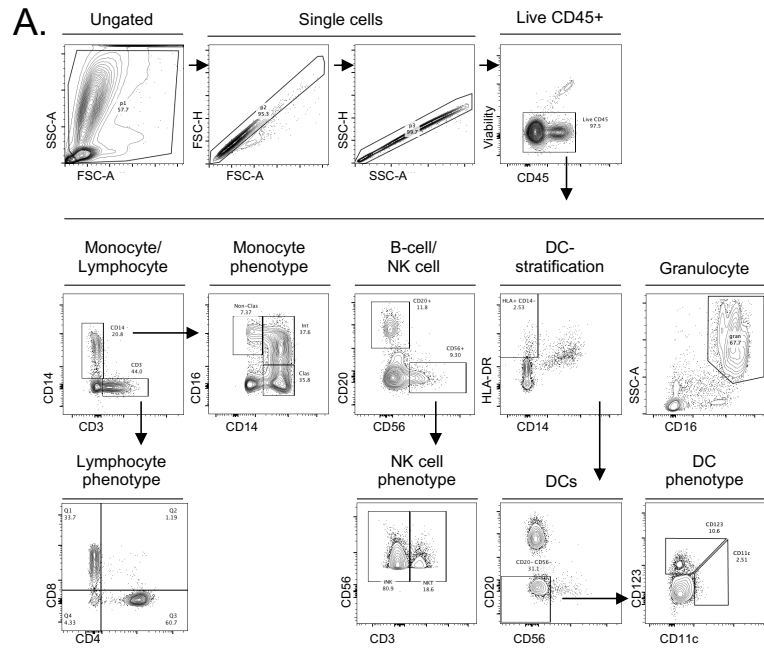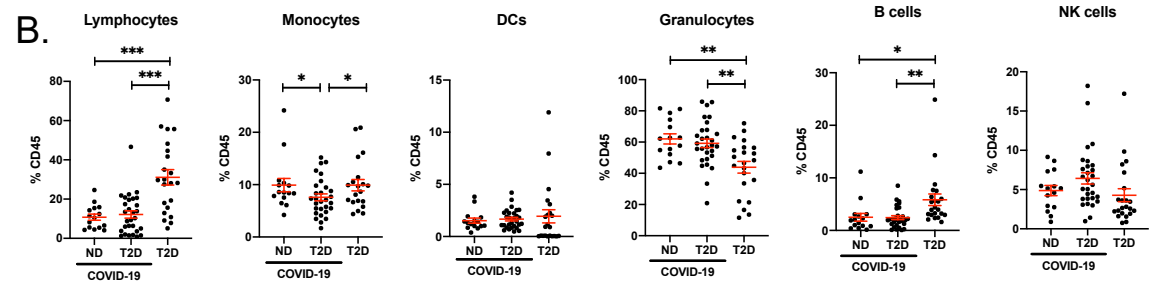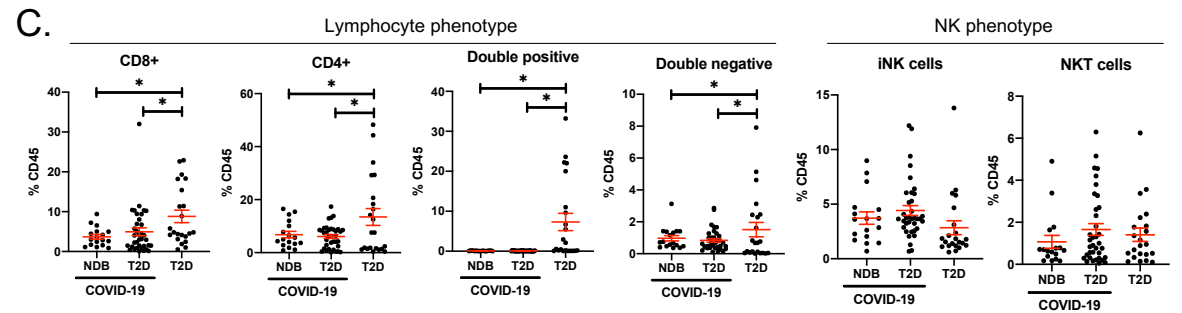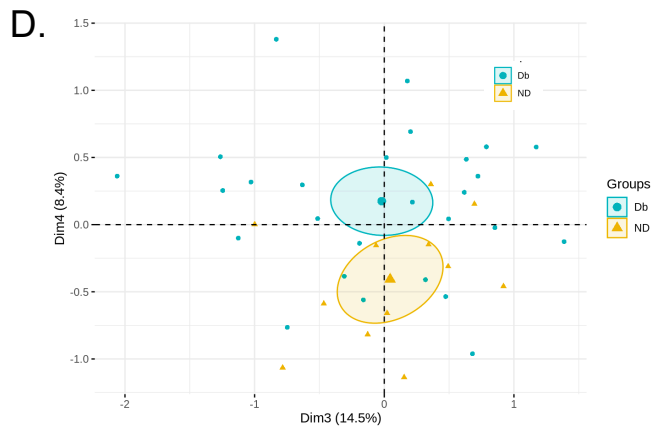

**Appendix Figure S1. Immunophenotyping approach and subpopulations quantified in peripheral venous blood.** Related to figure 1.

- A. Markers and gating strategy applied for immunophenotypic analysis of immune populations in peripheral circulation
- B. Major immune populations quantified in venous blood samples from type-2 diabetic (T2D) patients and in COVID-19 patients with T2D or in non-diabetic (ND) patients
- C. Subpopulations quantified in peripheral circulation of T2D patients and of COVID-19 patients with T2D or ND
- D. Principle component analysis on monocyte subpopulations from ND or T2D COVID-19 patients (d). Data are presented as mean +/- SEM

Data information: Differences between groups were evaluated with unpaired t-test. *p*-value. \* :  $p < 0.05$ ; \*\* :  $p < 0.01$ ; \*\*\* :  $p < 0.001$ .



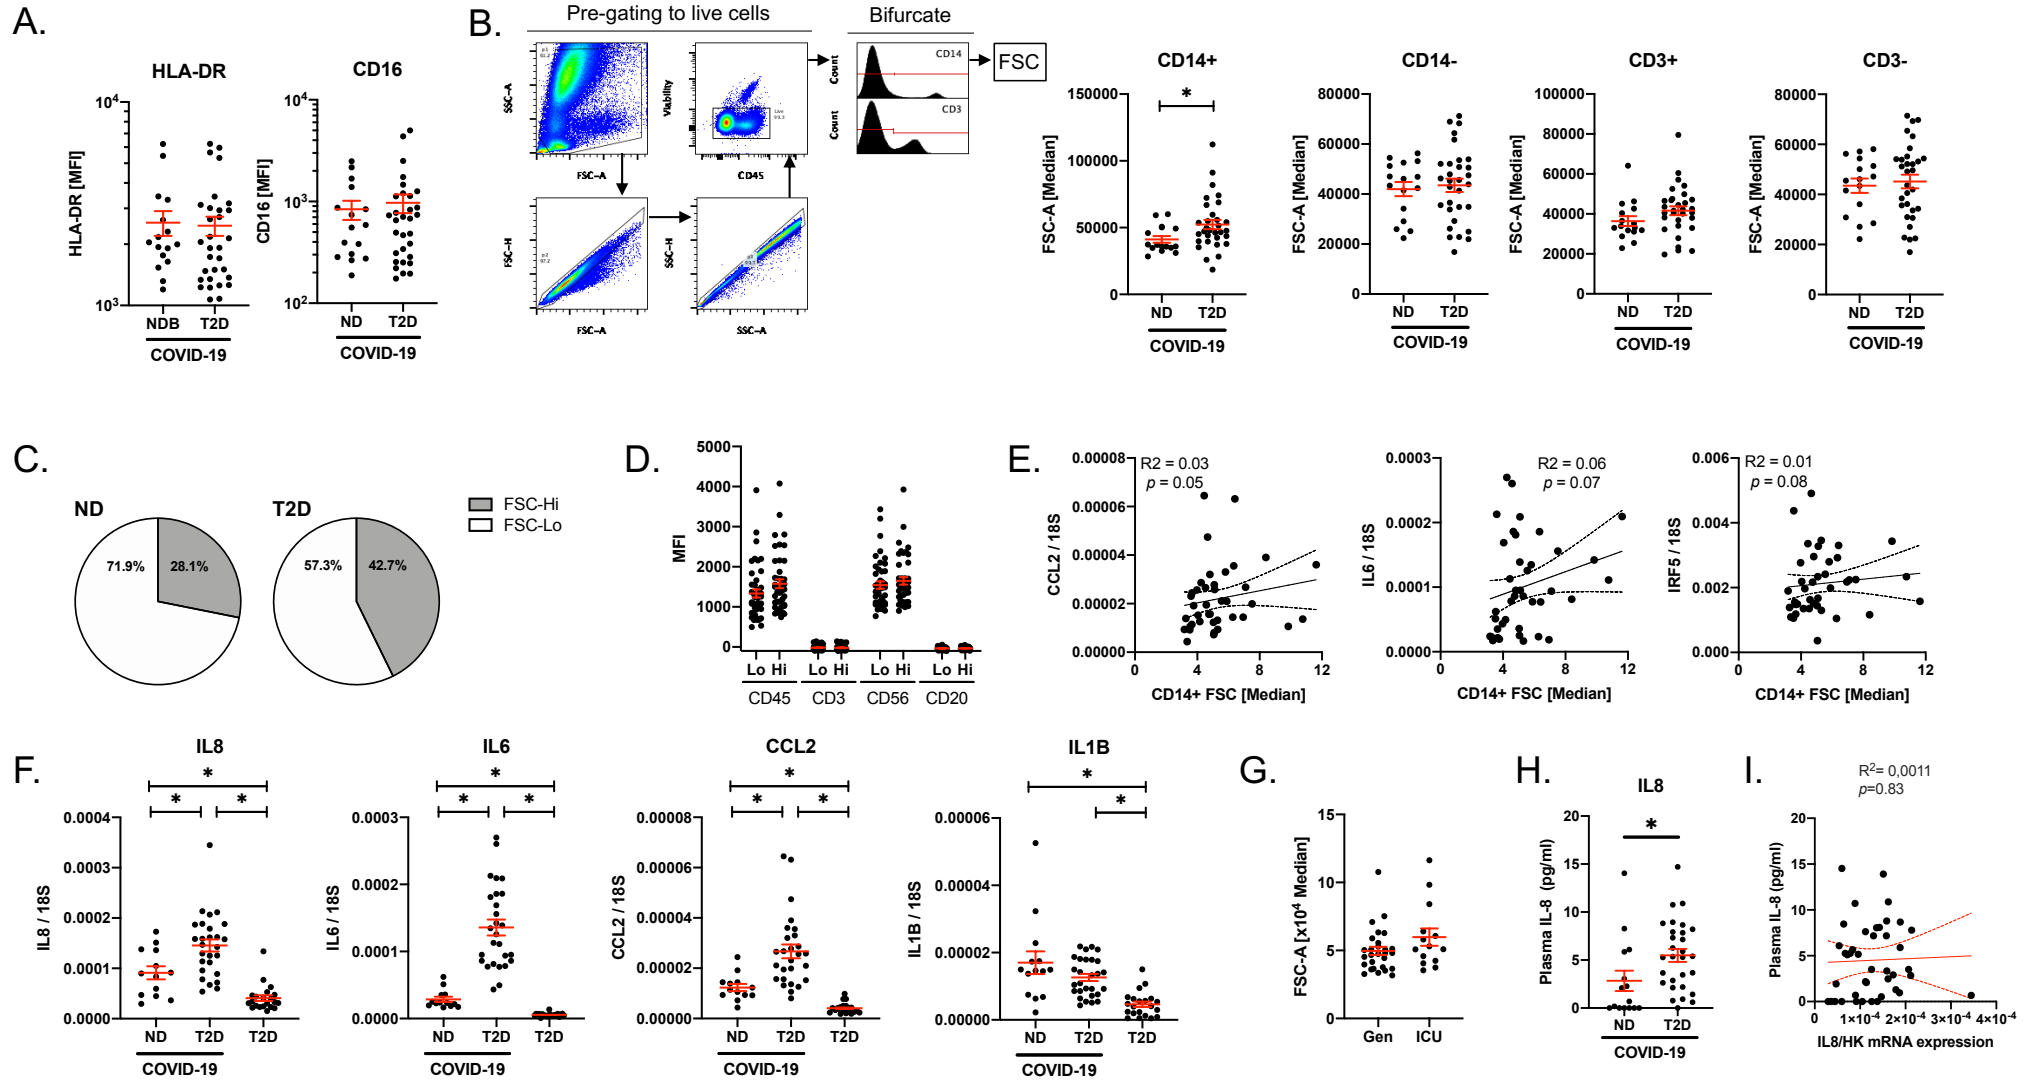

**Figure S2. Characterisation of monocyte morphology and inflammatory cells from peripheral circulation ND and T2D COVID-19 patients.** Related to figure 2.

- A. HLA-DR and CD16 expression in monocytes from ND and T2D COVID-19 patients.
- B. Alternative bifurcate gating strategy to evaluate monocyte and lymphocyte size (FSC) in CD14 and CD3 +/- cells from ND and T2D COVID-19 patients.
- C. Pie charts representing proportions of conventional (FSC<sup>Lo</sup>) and large (FSC<sup>Hi</sup>) monocytes in ND and T2D COVID-19 patients
- D. Lineage marker expression in FSC<sup>Lo</sup> and FSC<sup>Hi</sup> monocytes from ND and T2D COVID-19 patients.
- E. Correlation of inflammatory marker gene expression from peripheral blood mononuclear cells (PBMCs) to monocyte size (FSC) in ND and T2D COVID-19 patients
- F. Gene expression of inflammatory markers in PBMCs from ND and T2D COVID-19 patients and from T2D patients without COVID-19
- G. Monocyte size (FSC) in ND and T2D COVID-19 patients treated in general wards (Gen) or admitted to the intensive care unit (ICU).
- H. Plasma levels of IL8 from ND and T2D COVID-19 patients
- I. Correlative analyses of plasma IL8 and mRNA expression of IL8 in PBMCs from ND and T2D COVID-19 patients

Data information: Data are presented as mean +/- SEM. Differences between groups were evaluated with unpaired t-test (except for d. where pairing was by patient). Analyses of variance (ANOVA) or covariance (ANCOVA) were used for multiple group comparisons. For correlative analysis Spearman's test was carried out calculating a 2-tailed *p*-value. \* :  $p < 0.05$

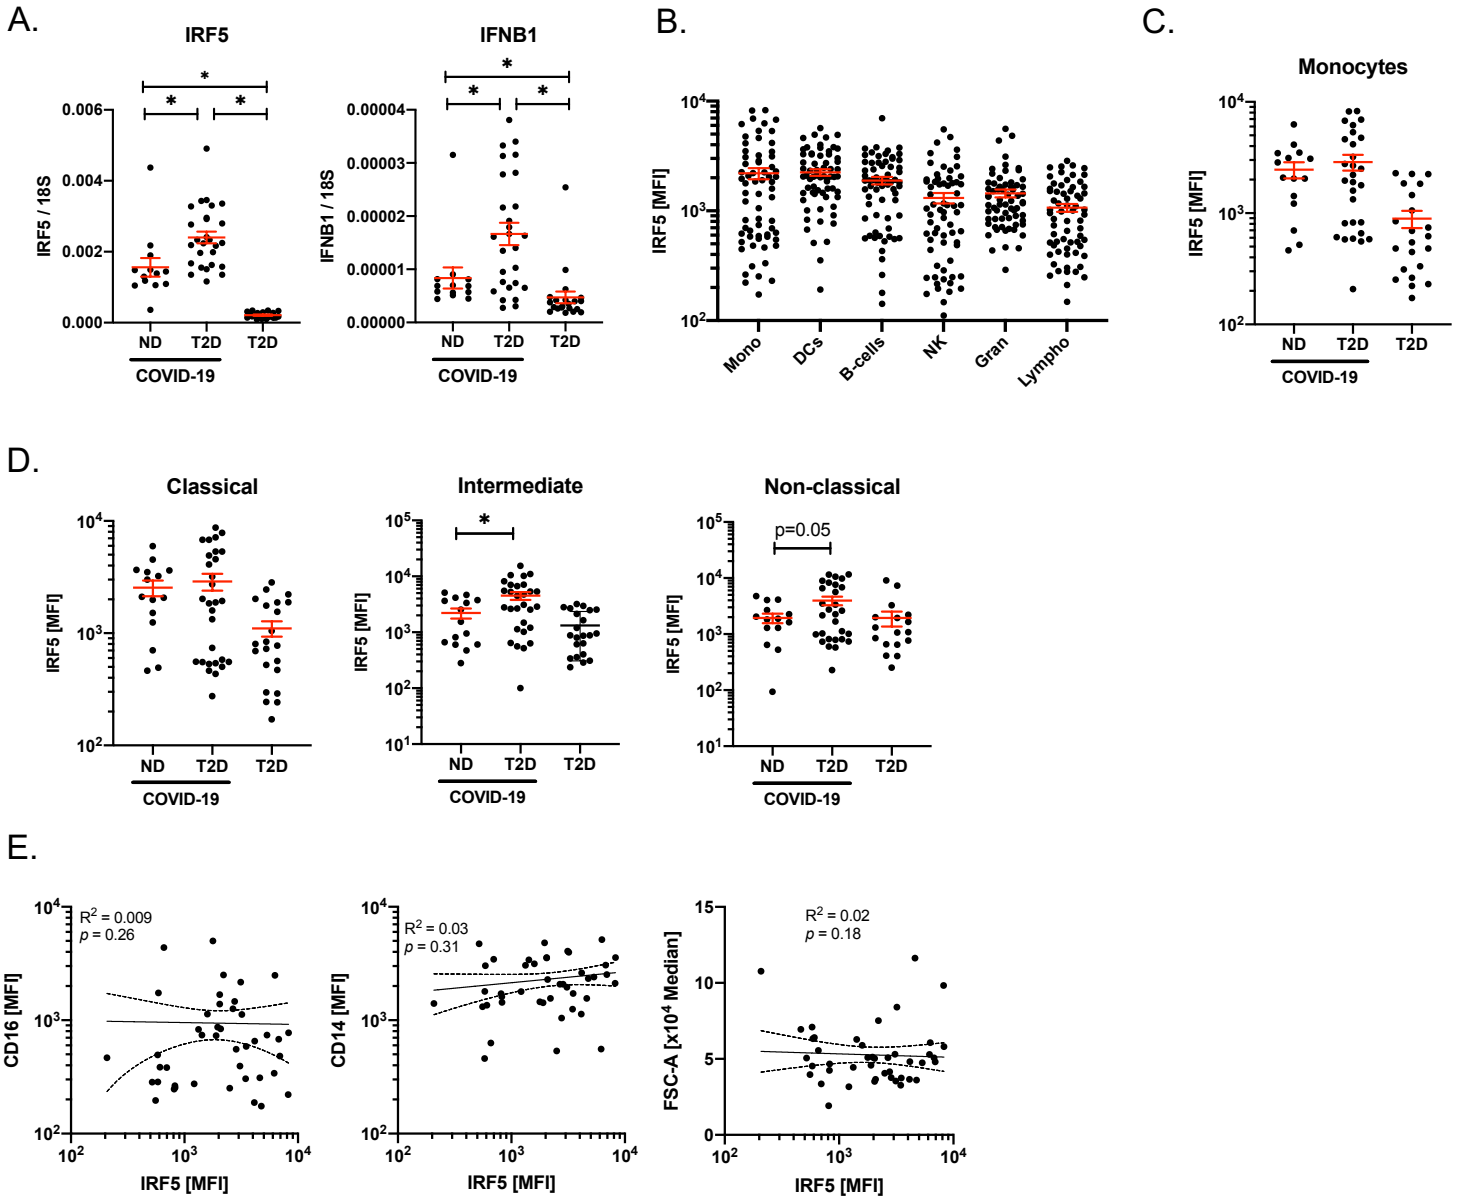

**Figure S3. Characterisation of monocyte morphology and inflammatory cells from peripheral circulation ND and T2D COVID-19 patients.** Related to figure 3.

- A. IRF5 and IFNB1 mRNA expression in COVID-19 patients with type-2 diabetes (T2D) and in non-diabetic (ND) patients.
- B. IRF5 expression by flow cytometry in different immune cell populations found in circulation in ND and T2D COVID-19 patients.
- C. IRF5 expression by flow cytometry in monocytes of ND and T2D COVID-19 patients and in T2D patients without COVID-19.
- D. IRF5 expression by flow cytometry in monocyte subpopulations of ND and T2D COVID-19 patients and in T2D patients without COVID-19.
- E. Correlative analyses of IRF5 expression by flow cytometry, to the expression of CD14, CD16 and to monocyte size (FSC) in monocytes of ND and T2D COVID-19 patients.

Data information: Differences between groups were evaluated with unpaired t-test. Analyses of variance (ANOVA) or covariance (ANCOVA) were used for multiple group comparisons. For correlative analysis Spearman's test was carried out calculating a 2-tailed  $p$ -value. \* :  $p < 0.05$

A.

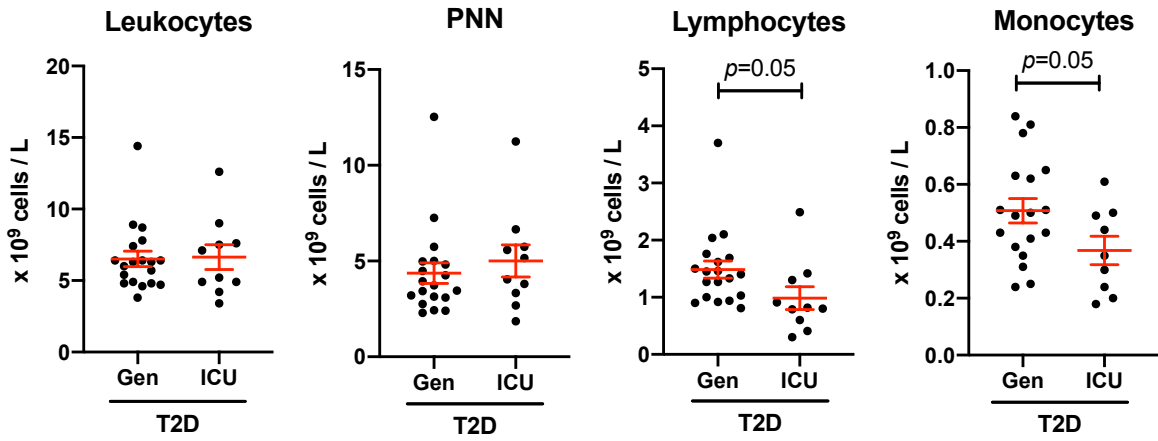

B.

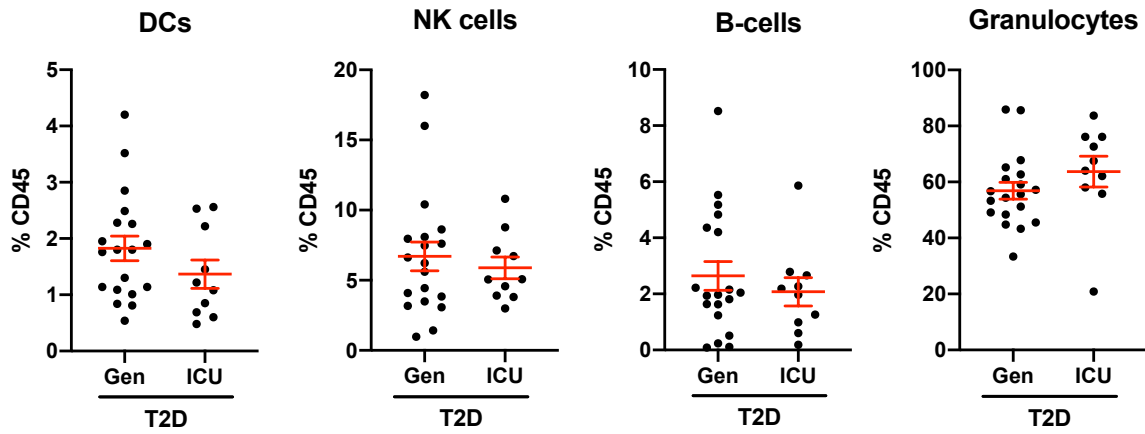

C.

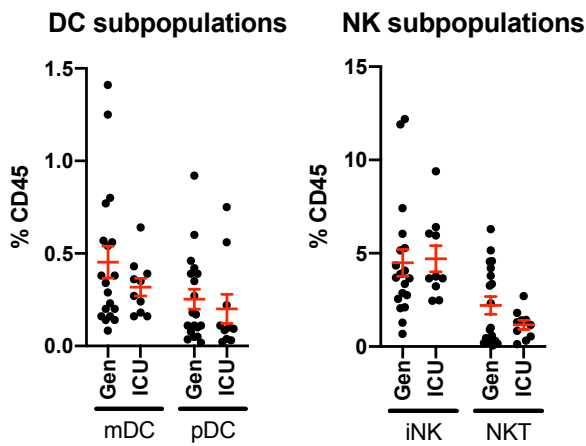

**Figure S4. Immunophenotypic analyses of T2D patients with COVID-19 treated in general wards or in ICU.** Related to figure 4.

- A. Absolute quantification of circulating leukocytes from full blood counts at admission of type-2 diabetic (T2D) COVID-19 patients treated in general wards (Gen) or in the intensive care unit (ICU)
- B. Flow cytometric quantification of dendritic cell (DC) natural killer (NK) cell, B cell and granulocyte frequency in peripheral blood of T2D COVID-19 patients treated in Gen or in the ICU
- C. DC and NK subpopulation frequency in peripheral blood of T2D COVID-19 patients treated in Gen or in the ICU

Data information: Data are presented as mean +/- SEM. Differences between groups were evaluated with unpaired t-test.
